# Supplementary material for: Thermodynamic stability, kinetic inertness and relaxometric properties of monoamide derivatives of lanthanide(iii) DOTA complexes
Source: Royal Society of Chemistry journal article supplement (doi:10.1039/c4dt03939d), 2015-01-01

## Supplementary Material

for

### **Thermodynamic stability, kinetic inertness and relaxometric properties of monoamide derivatives of lanthanide(III) DOTA complexes**

*Lorenzo Tei,<sup>a</sup> Zsolt Baranyai,<sup>b</sup> Luca Gaino,<sup>a</sup> Attila Forgács,<sup>a</sup> Adrienn Vágner<sup>b</sup> and Mauro Botta<sup>\*a</sup>*

*<sup>a</sup> Dipartimento di Scienze e Innovazione Tecnologica, Università del Piemonte Orientale “Amedeo Avogadro”, Viale T. Michel 11, I-15121, Alessandria, Italy*

*<sup>b</sup> Department of Inorganic and Analytical Chemistry, University of Debrecen, H-4010 Debrecen, Egyetem tér 1., Hungary*

#### **Table of content:**

|                                                                                               |        |
|-----------------------------------------------------------------------------------------------|--------|
| UV-spectrophotometric studies of Ce <sup>3+</sup> - <b>L1</b> system                          | page 1 |
| Species distribution of Gd <sup>3+</sup> - <b>L1</b> and Gd <sup>3+</sup> - <b>L2</b> systems | page 2 |
| Formation kinetics of Ln(HL <b>1</b> ) and Ln(HL <b>2</b> )                                   | page 2 |
| Dissociation kinetics of Gd <b>L1</b> and Gd <b>L2</b>                                        | page 5 |
| NMRD profile of Gd <b>L5</b> at 310 K                                                         | page 7 |

# 1. UV-spectrophotometric studies of $\text{Ce}^{3+}$ - **L1** system and the species distribution of $\text{Gd}^{3+}$ - **L1** and $\text{Gd}^{3+}$ - **L1** systems

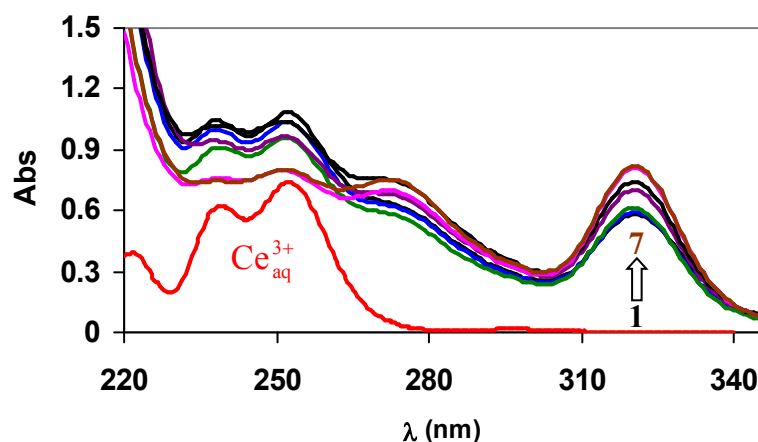

**Figure S1.** Absorption spectra of  $\text{Ce}^{3+}_{\text{aq}}$  and  $\text{Ce}^{3+}$  - **L1** systems ( $[\text{Ce}^{3+}] = [\text{DOTAEN}] = 1.5 \text{ mM}$ ,  $\text{pH} = 2.40$  (1), 2.46 (2), 2.63 (3), 2.75 (4), 3.18 (5), 3.55 (6) and 4.20 (7), 0.1 M KCl, 298 K)

It can be seen in Figure S1 that the absorption spectra of  $\text{Ce}^{3+}_{\text{aq}}$  and  $\text{Ce}^{3+}$  - **L1** systems differ considerably. In the wavelength range 300 – 340 nm, the absorbance values increase with the increase of pH due to the formation of the monoprotonated  $\text{Ce}(\text{HL1})$  complex in the pH range 2.4 – 4.2. In the wavelength range 300 – 340 nm, the absorption band of the  $\text{Ce}(\text{HL1})$  is characteristic for the  $\text{Ce}(\text{DOTA})$ -like complexes (Burai, L.; Fabian, I.; Kiraly, R.; Szilagyi, E.; Brucher, E. *Journal of the Chemical Society, Dalton Transactions* **1998**, 243.; Baranyai, Z.; Brucher, E.; Ivanyi, T.; Kiraly, R.; Lazar, I.; Zekany, L. *Helvetica Chimica Acta* **2005**, 88, 604.) in which the  $\text{Ce}^{3+}$ -ion is placed in the coordination cage formed by the ring N and carboxylate or amide O donor atoms. Since the absorption band of the  $\text{Ce}(\text{HL1})$  complexes is well separated from that of free  $\text{Ce}^{3+}_{\text{aq}}$ , the equilibrium studies were performed on the absorption band of  $\text{Ce}(\text{HL1})$ . By taking into account the molar absorptivities of  $\text{Ce}(\text{HL1})$  and the protonation constant ( $\log K_{\text{CeHL}}$ ) of the  $\text{Ce}(\text{L1})$  determined by the direct pH potentiometric titration of  $\text{Ce}(\text{L1})$ , the stability constant of  $\text{Ce}(\text{L1})$  was calculated from the absorbance values obtained at 10 wavelengths (Figure S1) in the pH range 2.4 – 4.2. The molar absorptivity values of the  $\text{Ce}(\text{HL1})$  were calculated from the absorption spectra of 1.0, 2.0 and 3.0 mM  $\text{Ce}(\text{HL1})$  complex recorded in the wavelength range 220 – 345 nm ( $\text{pH} = 6.0$ , 0.1 M KCl, 25 °C).

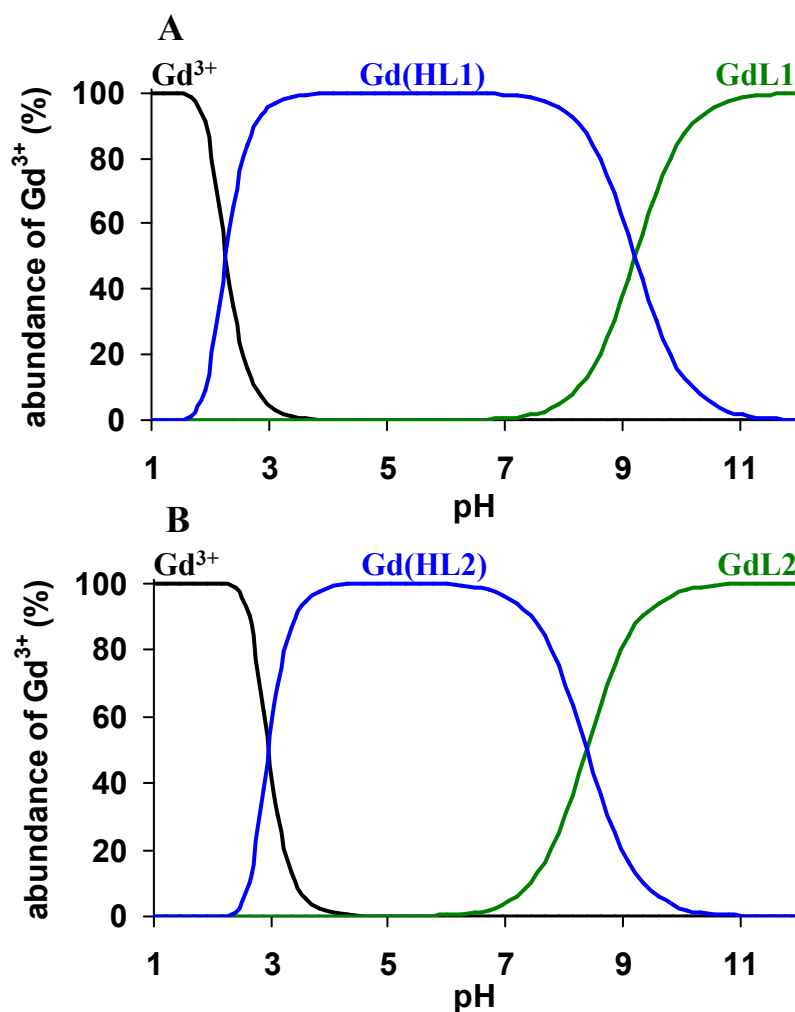

**Figure S2.** Species distribution of  $\text{Gd}^{3+}$  - L1 (A) and  $\text{Gd}^{3+}$  - L2 (B) systems ( $[\text{Gd}^{3+}] = [\text{L1}] = [\text{L2}] = 2.0 \text{ mM}$ ,  $0.1 \text{ M KCl}$ ,  $298 \text{ K}$ )

## 2. Formation kinetics of $\text{Ln}(\text{HL1})$ and $\text{Ln}(\text{HL2})$ :

The rates of the formation reactions of  $\text{Ce}(\text{III})$ - and  $\text{Eu}(\text{III})$ -complexes with **L1** and **L2** have been studied by spectrophotometry in the presence of 5 - 40 folds  $\text{Ln}(\text{III})$  ion excess in the pH range 3.5 - 6.0. The absorption spectra of the  $\text{Ce}^{3+}$ -**L1**,  $\text{Eu}^{3+}$ -**L1** and  $\text{Ce}^{3+}$ -**L2** reacting systems are shown in Figure S3 and S4.

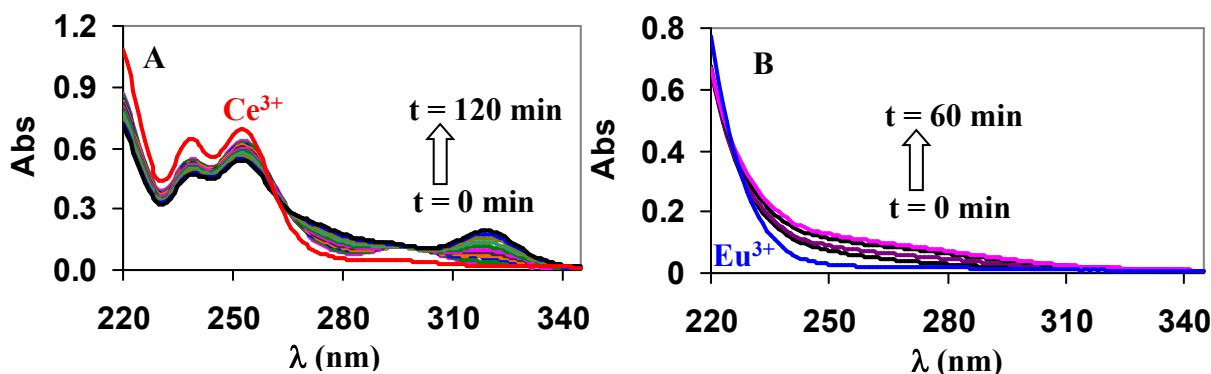

**Figure S3.** Absorption spectra of  $\text{Ce}^{3+}$  - L1 (A) and  $\text{Eu}^{3+}$  - L1 (B) reacting systems. ( $[\text{Ce}^{3+}] = [\text{Eu}^{3+}] = [\text{L1}] = 0.001 \text{ M}$ ,  $[\text{N-metil-piperazine}] = 0.01 \text{ M}$ ,  $\text{pH} = 4.65$ ,  $0.1 \text{ M KCl}$ ,  $25 \text{ }^\circ\text{C}$ )

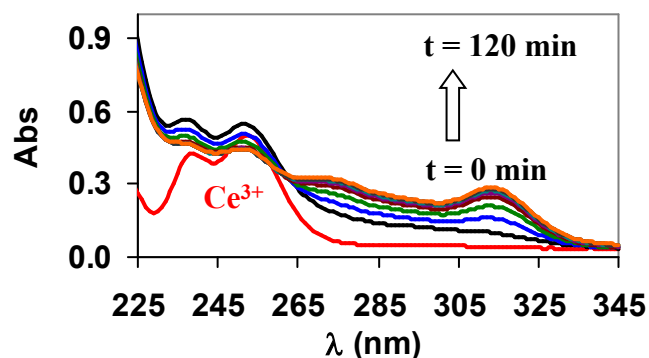

**Figure S4.** Absorption spectra of  $\text{Ce}^{3+}$  - **L2** reacting systems. ( $[\text{Ce}^{3+}] = [\text{L2}] = 0.6 \text{ mM}$ ,  $[\text{N-metil-piperazine}] = 0.01 \text{ M}$ ,  $\text{pH} = 4.80$ ,  $0.1 \text{ M KCl}$ ,  $25^\circ \text{C}$ )

In the investigated pH range,  $\text{Ln}(\text{HL1})$  and  $\text{Ln}(\text{HL2})$  complexes predominate in which the pendant amino nitrogen is protonated. At higher pH values, the formation reactions were too fast to be followed by conventional spectrophotometry and below  $\text{pH} = 3.5$  the complex formation was not complete. Under the conditions studied, the pseudo-first order rate constants ( $k_{\text{obs}}$ ) obtained are shown as a function of  $[\text{Ln}^{3+}]$  in Figures S5 and S6.

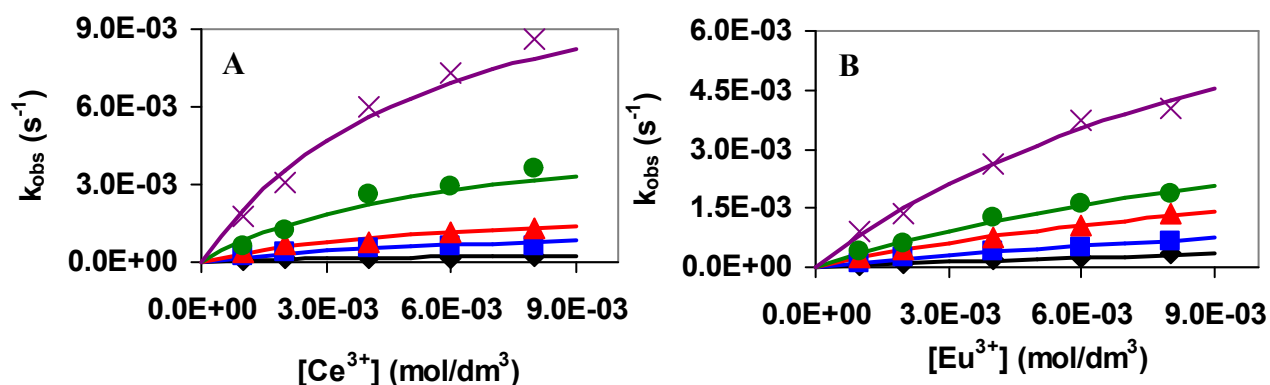

**Figure S5.** Pseudo-first order rate constants ( $k_{\text{obs}}$ ) for the formation of  $\text{Ce}(\text{HL1})$  (A) and  $\text{Eu}(\text{HL1})$  (B) complexes as a function of  $[\text{Ln}^{3+}]$  (A:  $[\text{L}] = 2 \times 10^{-4} \text{ M}$ ,  $\text{pH} = 4.7$  ( $\blacklozenge$ ),  $5.0$  ( $\blacksquare$ ),  $5.35$  ( $\blacktriangle$ ),  $5.65$  ( $\bullet$ ) and  $6.0$  ( $\times$ ); B:  $[\text{L}] = 2 \times 10^{-4} \text{ M}$ ,  $\text{pH} = 3.8$  ( $\blacklozenge$ ),  $4.2$  ( $\blacksquare$ ),  $4.5$  ( $\blacktriangle$ ),  $4.6$  ( $\bullet$ ) and  $4.9$  ( $\times$ ),  $[\text{N-methyl-piperazine}] = [\text{piperazine}] = 0.01 \text{ M}$ ,  $25^\circ \text{C}$ ,  $1.0 \text{ M KCl}$ )

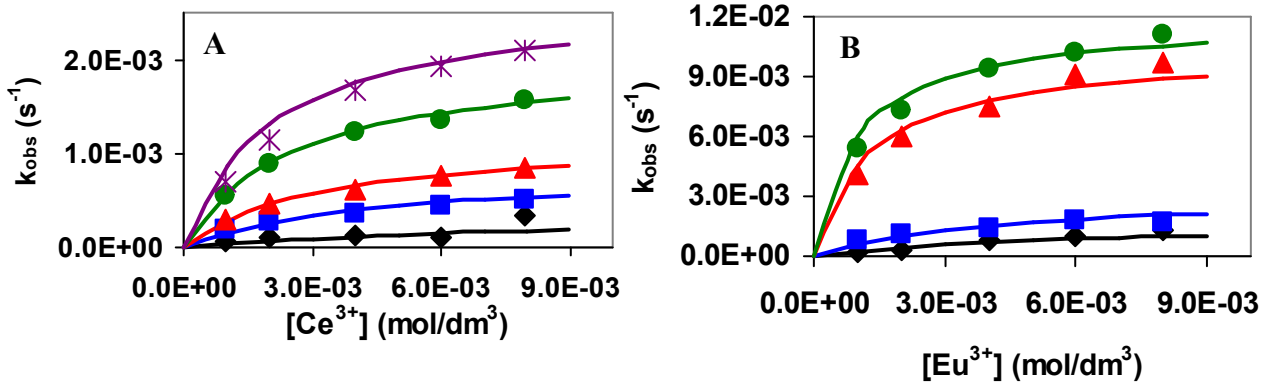

**Figure S6.** Pseudo-first order rate constants ( $k_{\text{obs}}$ ) for the formation of Ce(HL2) (A) and Eu(HL2) (B) complexes as a function of  $[\text{Ln}^{3+}]$  (A:  $[\text{L}]=2 \times 10^{-4}$  M, pH=3.85 ( $\blacklozenge$ ), 4.25 ( $\blacksquare$ ), 4.45 ( $\blacktriangle$ ), 4.65 ( $\bullet$ ) and 4.85 ( $\times$ ); B:  $[\text{L}]=2 \times 10^{-4}$  M, pH=3.60 ( $\blacklozenge$ ), 3.75 ( $\blacksquare$ ), 4.40 ( $\blacktriangle$ ) and 4.65 ( $\bullet$ ),  $[\text{N-methyl-piperazine}]=[\text{piperazine}]=0.01$  M, 25 °C, 1,0 M KCl)

The formation rates of Ln(HL1) and Ln(HL2) complexes are expressed by Eqn. (1)

$$\frac{d[\text{LnHL}]_t}{dt} = k_{\text{obs}}[\text{L}]_t \quad (1)$$

where  $k_{\text{obs}}$  is a pseudo-first order rate constant,  $[\text{L}]_t$  is the total concentration of the  $\text{H}_x\text{L1}$  and  $\text{H}_x\text{L2}$  ligands and  $[\text{LnHL}]_t$  is the total concentration of the Ln(HL1) and Ln(HL2) complexes. Based on the similarities to the  $\text{Ln}^{3+}$ -DOTA system, the formation rate of the Ln(HL1) and Ln(HL2) complexes can be expressed by Eqn. (2):

$$\frac{d[\text{LnHL}]_t}{dt} = k_{\text{obs}}[\text{L}]_t = k_f[*\text{Ln}(\text{H}_3\text{L})] \quad (2)$$

where  $[\text{*Ln}(\text{H}_3\text{L})]$  is the concentration of the triprotonated  $*\text{Ln}(\text{H}_3\text{L})$  intermediate and  $k_f$  is the rate constant characterizing the deprotonation and rearrangement of the intermediate into LnHL complexes. By taking into account the protonation constants of **L1** and **L2** ( $\log K_1^{\text{H}}$ , Table 1), the conditional stability constants of the  $*\text{Ln}(\text{H}_3\text{L})$  intermediates ( $*K_{\text{Ln}(\text{H}_3\text{L})}^{\text{c}} = [\text{*Ln}(\text{H}_3\text{L})]/[\text{Ln}^{3+}][\text{H}_3\text{L}]$ ), the pseudo-first order rate constant can be expressed by Eqn. (3), which was used for the fitting of the  $k_{\text{obs}}$  values to determine the  $k_f$  rate constant and the stability constant ( $*K_{\text{Ln}(\text{H}_3\text{L})}$ ) of the  $*\text{Ln}(\text{H}_3\text{L})$  intermediate.

$$k_{\text{obs}} = \frac{k_f *K_{\text{Ln}(\text{H}_3\text{L})}^{\text{c}} K_1^{\text{H}} K_2^{\text{H}} K_3^{\text{H}} [\text{Ln}^{3+}][\text{H}^+]^3}{\alpha_{\text{H}} + *K_{\text{Ln}(\text{H}_3\text{L})}^{\text{c}} K_1^{\text{H}} K_2^{\text{H}} K_3^{\text{H}} [\text{Ln}^{3+}][\text{H}^+]^3} \quad (3)$$

where  $\alpha_{\text{H}} = 1 + K_1^{\text{H}}[\text{H}^+] + K_1^{\text{H}}K_2^{\text{H}}[\text{H}^+]^2 + \dots + K_1^{\text{H}}K_2^{\text{H}}K_3^{\text{H}}K_4^{\text{H}}K_5^{\text{H}}K_6^{\text{H}}[\text{H}^+]^6$ .

### 3. Dissociation kinetics of Gd(L1) and Gd(L2):

The dissociation reactions of Gd(L1) and Gd(L2) were studied by  $^1\text{H}$ -NMR relaxometry in the  $[\text{H}^+]$  range 0.05 – 1.0 M. The relaxivity values of the Gd(L1) and Gd(L2) in 0.95 M HCl as a function of time are shown in Figure S7.

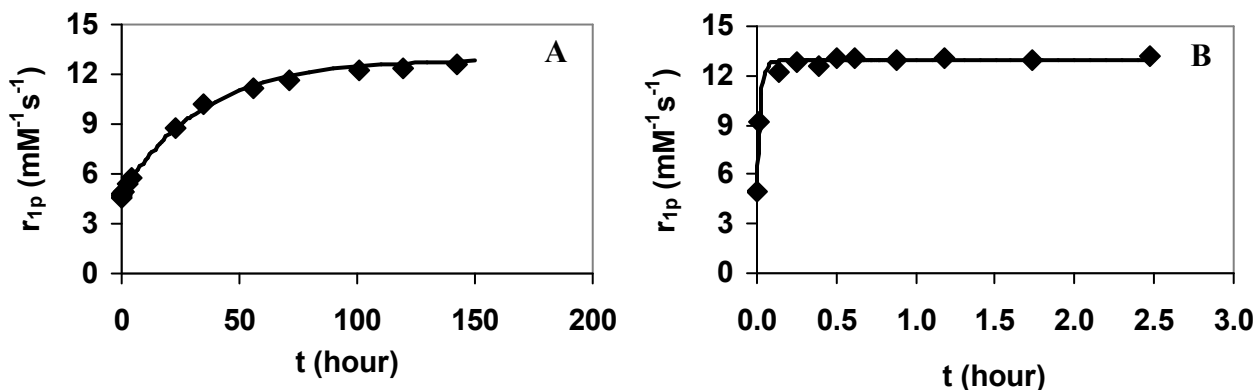

**Figure S7.** The relaxivity values of the Gd(L1) and Gd(L2) in 0.95 M HCl ( $[\text{GdL}]=0.001 \text{ M}$ ,  $[\text{H}^+]=0.95 \text{ M}$   $[\text{HCl}]+[\text{KCl}]=1.0 \text{ M}$ , 298 K)

In the presence of excess of  $\text{H}^+$  ion the dissociation reactions of Gd(L1) and Gd(L2) can be treated as pseudo-first-order processes and the reaction rates can be expressed with Eqn. (4), where  $k_d$  is a pseudo-first-order rate constant,  $[\text{GdL}]_t$  and  $[\text{GdL}]_{\text{tot}}$  are the concentrations of the GdL containing species at time  $t$  and at the beginning of the reaction.

$$-\frac{d[\text{GdL}]_t}{dt} = k_d [\text{GdL}]_{\text{tot}} \quad (4)$$

The obtained pseudo-first-order rate constants characterizing the dissociation reactions of Gd(L1) and Gd(L2) are shown in Figure S8.

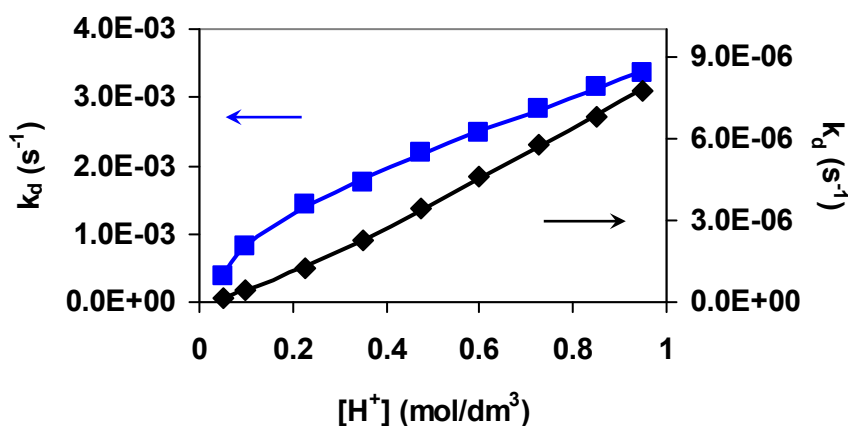

**Figure S8.** Pseudo-first-order rate constants ( $k_d$ ) characterizing the dissociation reactions of Gd(L1) and Gd(L2) ( $[\text{GdL}]=0.001 \text{ M}$ ,  $[\text{HCl}]+[\text{KCl}]=1.0 \text{ M}$ , 298 K)

As shown in Figure S8 the dissociation rates of Gd(**L1**) and Gd(**L2**) are proportional to  $[H^+]$ . The increase of  $k_d$  with increasing  $H^+$  concentration can be interpreted in terms of the proton assisted dissociation of Gd(**L1**) and Gd(**L2**) complexes.

Considering the relatively high protonation constant of the aminoethyl group of Gd(**L1**) and Gd(**L2**) complexes (Gd(**L1**):  $\log K_{GdHL}=9.24$ ; Gd(**L2**):  $\log K_{GdHL}=8.40$ ), the dissociation reactions essentially occur by the spontaneous dissociation of monoprotonated Gd(HL) complexes (Eqn. (5)), by the formation (Eqn. (6)) and the dissociation of diprotonated Gd(H<sub>2</sub>L) complexes (Eqn. (7)) and by the proton assisted dissociation of the diprotonated Gd(H<sub>2</sub>L) complexes (Eqn. (8)).

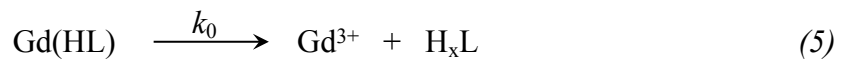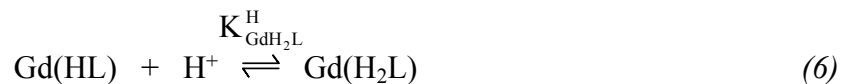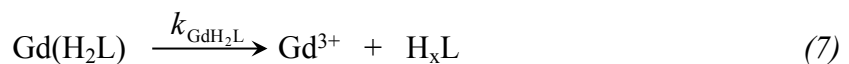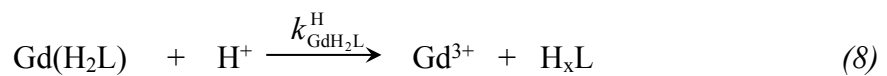

By taking into account all the possible pathways, the pseudo-first-order rate constant ( $k_d$ ) of dissociation reaction of Gd(**L1**) and Gd(**L2**) can be expressed by Eq. (9).

$$-\frac{d[GdHL]}{dt} = k_0[GdHL] + k_{GdH_2L}[GdH_2L] + k_{GdH_2L}^H[GdH_2L][H^+] \quad (9)$$

By taking into account the total concentration of the complex ( $[GdL]_{tot}=[Gd(HL)]+[Gd(H_2L)]$ ), and the protonation constant ( $K_{GdH_2L}^H$ ) of Gd(HL) complexes (Eqn. (6)), the pseudo-first-order rate constant ( $k_d$ ) can be expressed as follows:

$$k_d = \frac{k_0 + k_1[H^+] + k_2[H^+]^2}{1 + K_{GdH_2L}^H[H^+]} \quad (10)$$

where  $k_0$ ,  $k_1$  ( $= k_{GdH_2L} \times K_{GdH_2L}^H$ ) and  $k_2$  ( $= k_{GdH_2L}^H \times K_{GdH_2L}^H$ ) are the rate constants characterizing the spontaneous and the proton-assisted dissociation of Gd(**HL1**) and Gd(**HL2**), respectively. The  $k_0$ ,  $k_1$ ,  $k_2$  and  $K_{GdH_2L}^H$  were calculated by fitting the data points presented in Figure S7 to the Eqn. (10).

#### 4. $^1\text{H}$ NMRD profile of GdL5 at 310 K

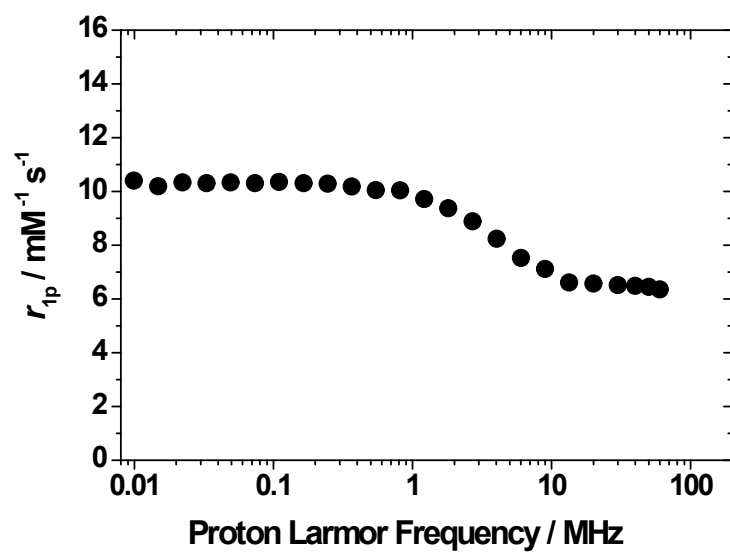

Supplement: c4dt03939d1.pdf [file c4dt03939d1.pdf]
